# Supplementary material
Source: MDPI journal article supplement (https://www.mdpi.com/2220-9964/9/9/516)
Supplement: s1 [file s1]

**Table S1.** Corine Land Cover classes present in the scene and the categorical value of LULC score attributed according to the CLC type.

| CLC Level 1                   | CLC Label 2                                     | CLC Label 3                                                                            | LULC Value |
|-------------------------------|-------------------------------------------------|----------------------------------------------------------------------------------------|------------|
| Artificial surfaces           | Urban fabric                                    | Continuous urban fabric                                                                | 0          |
| Artificial surfaces           | Urban fabric                                    | Discontinuous urban fabric                                                             | 0          |
| Artificial surfaces           | Industrial, commercial and transport units      | Industrial or commercial units                                                         | 0          |
| Artificial surfaces           | Industrial, commercial and transport units      | Road and rail networks and associated land                                             | 0          |
| Artificial surfaces           | Industrial, commercial and transport units      | Port areas                                                                             | 0          |
| Artificial surfaces           | Industrial, commercial and transport units      | Airports                                                                               | 0          |
| Artificial surfaces           | Mine, dump and construction sites               | Mineral extraction sites                                                               | 0          |
| Artificial surfaces           | Mine, dump and construction sites               | Dump sites                                                                             | 0          |
| Artificial surfaces           | Mine, dump and construction sites               | Construction sites                                                                     | 0          |
| Artificial surfaces           | Artificial, non-agricultural vegetated areas    | Green urban areas                                                                      | 1          |
| Artificial surfaces           | Artificial, non-agricultural vegetated areas    | Sport and leisure facilities                                                           | 0          |
| Agricultural areas            | Arable land                                     | Non-irrigated arable land                                                              | 3          |
| Agricultural areas            | Arable land                                     | Permanently irrigated land                                                             | 1          |
| Agricultural areas            | Arable land                                     | Rice fields                                                                            | 1          |
| Agricultural areas            | Permanent crops                                 | Vineyards                                                                              | 2          |
| Agricultural areas            | Permanent crops                                 | Fruit trees and berry plantations                                                      | 2          |
| Agricultural areas            | Permanent crops                                 | Olive groves                                                                           | 2          |
| Agricultural areas            | Pastures                                        | Pastures                                                                               | 2          |
| Agricultural areas            | Heterogeneous agricultural areas                | Annual crops associated with permanent crops                                           | 3          |
| Agricultural areas            | Heterogeneous agricultural areas                | Complex cultivation patterns                                                           | 3          |
| Agricultural areas            | Heterogeneous agricultural areas                | Land principally occupied by agriculture, with significant areas of natural vegetation | 3          |
| Agricultural areas            | Heterogeneous agricultural areas                | Agro-forestry areas                                                                    | 3          |
| Forest and semi natural areas | Forests                                         | Broad-leaved forest                                                                    | 4          |
| Forest and semi natural areas | Forests                                         | Coniferous forest                                                                      | 4          |
| Forest and semi natural areas | Forests                                         | Mixed forest                                                                           | 4          |
| Forest and semi natural areas | Scrub and/or herbaceous vegetation associations | Natural grasslands                                                                     | 3          |
| Forest and semi natural areas | Scrub and/or herbaceous vegetation associations | Moors and heathland                                                                    | 3          |
| Forest and semi natural areas | Scrub and/or herbaceous vegetation associations | Sclerophyllous vegetation                                                              | 3          |
| Forest and semi natural areas | Scrub and/or herbaceous vegetation associations | Transitional woodland-shrub                                                            | 3          |

|                               |                                          |                             |   |
|-------------------------------|------------------------------------------|-----------------------------|---|
| Forest and semi natural areas | Open spaces with little or no vegetation | Beaches, dunes, sands       | 0 |
| Forest and semi natural areas | Open spaces with little or no vegetation | Bare rocks                  | 0 |
| Forest and semi natural areas | Open spaces with little or no vegetation | Sparsely vegetated areas    | 1 |
| Forest and semi natural areas | Open spaces with little or no vegetation | Burnt areas                 | 2 |
| Forest and semi natural areas | Open spaces with little or no vegetation | Glaciers and perpetual snow | 0 |
| Wetlands                      | Inland wetlands                          | Inland marshes              | 2 |
| Wetlands                      | Inland wetlands                          | Peat bogs                   | 2 |
| Wetlands                      | Maritime wetlands                        | Salt marshes                | 1 |
| Wetlands                      | Maritime wetlands                        | Salines                     | 1 |
| Wetlands                      | Maritime wetlands                        | Intertidal flats            | 1 |
| Water bodies                  | Inland waters                            | Water courses               | 0 |
| Water bodies                  | Inland waters                            | Water bodies                | 0 |
| Water bodies                  | Marine waters                            | Coastal lagoons             | 0 |
| Water bodies                  | Marine waters                            | Estuaries                   | 0 |
| Water bodies                  | Marine waters                            | Sea and ocean               | 0 |
| NoData                        | NoData                                   | NoData                      | 0 |
| Unclassified                  | Unclassified land surface                | Unclassified land surface   | 0 |
| Unclassified                  | Unclassified water bodies                | Unclassified water bodies   | 0 |
| Unclassified                  | Unclassified                             | Unclassified                | 0 |
